# Supplementary material for: Compensatory changes in CYP expression in three different toxicology mouse models: CAR-null, Cyp3a-null, and Cyp2b9/10/13-null mice
Source: PubMed Central journal article supplement (PMC5370058; doi:10.1371/journal.pone.0174355), 2017-03-28
Supplement: pone.0174355.s001.pdf [file pone.0174355.s001.pdf]

26,500

Ccdc97  
Hnrnpull1  
Ax1  
Cyp2s1

~~Cyp2b10~~  
~~Cyp2b13~~  
~~Cyp2b9~~

Vmn1r184  
Cyp2a4  
Nlrp9c  
Nlrp4a  
Nlrp9a  
Vmn1r185

Cyp2b23  
Cyp2b19

Cyp2g1  
Cyp2a5

27,630

**S1 Fig. A cluster of Cyp2b genes are found on chromosome 7 (26,500K – 27,630K).** All five Cyp2b subfamily members are located in the 7A region of chromosome 7. However, there are six genes between two Cyp2b regions; Therefore, we knocked out the three predominant hepatic CYPs (Cyp2b9/10/13) via partial chromosomal deletion using Crispr/Cas9 because it would not impact other genes.
