# Supplementary material for: Compensatory changes in CYP expression in three different toxicology mouse models: CAR-null, Cyp3a-null, and Cyp2b9/10/13-null mice
Source: PubMed Central journal article supplement (PMC5370058; doi:10.1371/journal.pone.0174355), 2017-03-28

**S2 Fig. Testosterone concentrations in nullizygous mice.** Testosterone concentrations in the liver of CAR-null (A), Cyp3a-null (B), Cyp2b9/10/13-null (C) and serum of Cyp2b9/10/13-null mice were measured and compared to their WT counterparts. Testosterone concentrations from liver cytosol or serum were measured by EIA using a kit from Cayman Chemical Company (Ann Arbor, MI). Data are presented as mean testosterone concentrations  $\pm$  SEM (n = 3-4). A <sup>c</sup> indicates a significant difference between male and female WT mice and <sup>d</sup> indicates a significant difference between male and female nullizygous mice. There are no significant differences between nullizygous mice and their WT counterparts. Statistical differences were determined by one-way ANOVA followed by Fisher's LSD as the post-hoc test. A letter without an asterisk indicates a significance of  $p < 0.05$ , asterisk indicate significance of  $**p < 0.001$ , and  $***p < 0.0001$ , respectively.

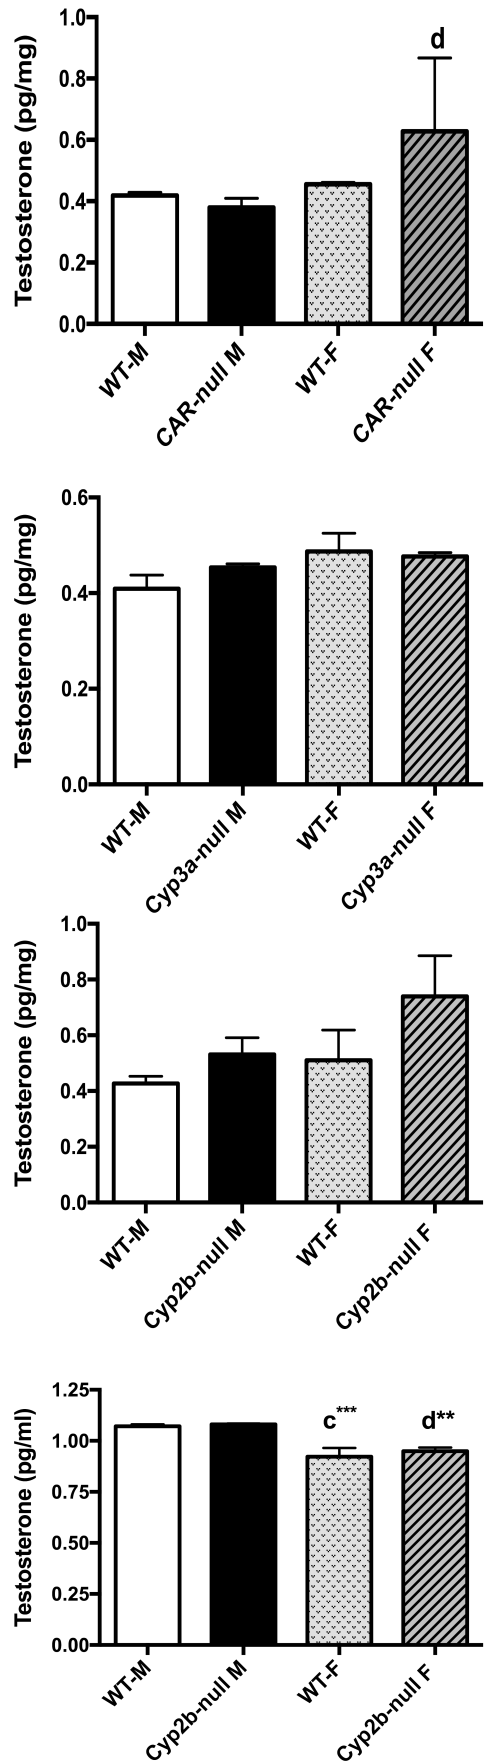

Supplement: pone.0174355.s002.pdf [file pone.0174355.s002.pdf]
